# Supplementary material for: Metabolic Roles of Plant Mitochondrial Carriers
Source: PubMed Central journal article supplement (PMC7408384; doi:10.3390/biom10071013), 2020-07-08
Supplement: biomolecules-10-01013-s001.pdf [file biomolecules-10-01013-s001.pdf]

**Supplemental Table 1.** Orthologous genes of plant mitochondrial carriers families retrieved from Plaza server (<https://bioinformatics.psb.ugent.be/plaza/>).

| <i>A. thaliana</i> | Orthologous Genes      |                      |                    | Function             |
|--------------------|------------------------|----------------------|--------------------|----------------------|
|                    | <i>S. lycopersicum</i> | <i>B. distachyon</i> | <i>lucimarinus</i> | Predicted            |
| At3g08580          | Solyc01g087070         | BD1G29260            | OL10G01660         | AAC1                 |
| At5g13490          | Solyc06g069410         | BD3G53520            | –                  | AAC2                 |
| At4g28390          | Solyc07g053830         | –                    | –                  | AAC3                 |
|                    | Solyc11g062130         |                      |                    |                      |
|                    | Solyc11g062190         |                      |                    |                      |
| At5g17400          | Solyc01g014210         | –                    | –                  | AAC4                 |
| At5g56450          | Solyc08g063010         | BD2G18347            | OL03G05390         | Unknown1 (AAC?)      |
| At1g78180          | Solyc06g068720         | BD1G71800            | –                  | Unknown2 (AAC?)      |
| At5g64970          | Solyc04g056260         | –                    | –                  | Unknown3 (AAC?)      |
|                    | Solyc05g051560         | –                    | –                  | Unknown3 (AAC?)      |
|                    | Soluc04g074130         | –                    | –                  | Unknown3 (AAC?)      |
| At5g61810          |                        | BD1G36570            | –                  | APC1                 |
| At5g51050          |                        | –                    | –                  | APC2                 |
| At5g07320          |                        | –                    | –                  | APC3                 |
| At3g51870          |                        | BD2G09790            | OL10G01620         | Unknown4 (CoA/PAP?)  |
| At5g01500          | Solyc06g82290          | –                    | –                  | Unknown5 (CoA/PAP?)  |
| At3g20240          | Solyc03g123990         | BD3G40497            | OL02G00320         | Unknown6 (Nt)        |
| –                  |                        | BD4G34100            | OL12G03180         | Unknown7 (Nt)        |
| –                  |                        | BD5G26776            | –                  | Unknown8 (Nt)        |
| At3g05290          | Solyc01g009810         | BD2G26480            | –                  | Unknown9 (Ant1?)     |
| At5g27520          | Solyc01g079760         | –                    | –                  | Unknown10 (Ant1?)    |
| At4g32400          | Solyc06g061090         | BD2G34270            | OL03G01320         | Unknown11 (Nt)       |
| –                  |                        | BD1G36670            | OL12G00350         | Unknown12 (Nt)       |
| –                  |                        | BD3G07500            | OL15G01450         | Unknown13 (Nt)       |
| At4g01100          |                        | BD2G14840            | OL03G04280         | Unknown14 (CoA/PAP?) |
| At1g14560          | Solyc08g081070         | BD2G47880            | OL08G02620         | Unknown15 (CoA/PAP?) |
| At4g26180          | Solyc08g062860         | BD3G08557            | –                  | Unknown16 (CoA/PAP?) |
|                    | Solyc12g008770         |                      | –                  | Unknown16 (CoA/PAP?) |
| –                  |                        | BD2G41500            | –                  | Unknown17 (CoA/PAP?) |
| At3g53940          |                        | BD2G02880            | OL07G00540         | Unknown18 (Nt)       |
| At3g55640          | Solyc09g011360         | BD1G66990            | –                  | Unknown19 (Nt)       |
| At2g37890          |                        | –                    | –                  | Unknown20 (Nt)       |
| At3g21390          | Solyc04g050040         | BD2G59930            | OL13G02340         | Unknown21 (TPC?)     |
| At5g48970          | Solyc12g099640         | –                    | OL21G00660         | Unknown22 (TPC?)     |
|                    | Solyc01g067070         | –                    |                    | Unknown22 (TPC?)     |
| At5g66380          | Solyc02g088770         | BD1G09560            | OL13G02140         | FAD1 (folate?)       |
| –                  |                        | –                    | OL21G00840         | FAD2                 |
| At2g47490          | Solyc09g075490         | BD2G28120            | OL11G01860         | NDT1                 |
| At1g25380          | Solyc05g009020         | –                    | –                  | NDT2                 |
| At2g39970          | Solyc05g052640         | BD1G69370            | OL20G02530         | Unknown23 (NT)       |
|                    |                        | BD1G67180            | –                  | Unknown24 (NT)       |
| At2g22500          |                        | BD3G38410            | –                  | DIC1                 |
| At4g24570          | Solyc09g031680         | BD4G32510            | –                  | DIC2                 |
| At5g09470          | Solyc05g051400         | –                    | –                  | DIC3                 |
|                    | Solyc11g010500         | –                    | –                  | DIC3                 |
| –                  |                        | –                    | OL14G02490         | Unknown25 (DIC?)     |

|           |                 |           |            |                        |
|-----------|-----------------|-----------|------------|------------------------|
| At5g19760 | Solyc01g005620  | BD2G06520 | OL10G00520 | DTC                    |
|           | Solyc01g021740  |           |            | DTC                    |
| At4g03115 | Solyc08g074370  | BD2G32600 | -          | Unknown26 (DTC?)       |
| At5g01340 | Solyc10g085220  | BD1G65510 | OL07G03670 | SFC1                   |
| At4g11440 |                 | -         | -          | Unknown27 (acids)      |
| At5g42130 | Solyc04g071010  | BD2G61677 | OL16G01220 | Unknown28 (acids)      |
| -         | Solyc11g0077070 | -         | OL03G02490 | Unknown29 (acids)      |
| -         | Solyc04g071290  | -         | OL11G02620 | Unknown30 (acids)      |
| At2g33820 | Solyc02g077910  | BD1G15960 | OL01G00440 | ORNITHINE1             |
|           | Solyc10g009090  |           |            | ORNITHINE1             |
| At1g79900 | Solyc03g120100  | BD2G07420 | -          | ORNITHINE2             |
|           | Solyc06g066680  |           | -          | ORNITHINE2             |
| -         | Solyc08g060020  | -         | OL02G00080 | Unknown31 (ornithine)  |
| At5g46800 | Solyc06g061170  | BD3G34077 | -          | Unknown32 (amino acid) |
| At4g27940 | Solyc08g082020  | BD3G34090 | OL12G01640 | Unknown33 (amino acid) |
| At2g46320 | Solyc03g007430  | BD2G07390 | OL01G03790 | Unknown34 (amino acid) |
| -         |                 | BD3G34820 | -          | Unknown35 (amino acid) |
| At4g39460 | Solyc04g051580  | BD1G71410 | OL01G03770 | SAMC1                  |
| At1g34065 | Solyc12g056600  | BD1G01770 | -          | SAMC2                  |
| At1g74240 |                 | BD1G70017 | OL13G02410 | Unknown36 (samc?)      |
| At2g26360 |                 | BD4G45190 | OL21G00590 | Unknown37 (samc?)      |
| At2g35800 | Solyc10g079200  | -         | -          | Unknown38 (samc?)      |
| -         |                 | BD5G16330 | OL17G01690 | Unknown39 (amino acid) |
| At3g54110 | Solyc09g011920  | BD4G09060 | OL07G04120 | UCP1                   |
| At5g58970 |                 | BD2G40390 | -          | UCP2                   |
| At1g14140 | Solyc05g007730  | BD5G11757 | -          | UCP3                   |
| At2g30160 | Solyc01g095570  | BD1G65170 | OL06G04180 | MRS3                   |
|           | Solyc01g011670  |           |            |                        |
| At1g07030 | Solyc01g095510  | -         | -          | Mrs4                   |
| At2g17270 | Solyc06g072510  | BD4G37420 | OL17G01410 | Unknown40 (phosphate?) |
| At5g14040 | Solyc03g097840  | BD3G57890 | -          | PIC1                   |
| At3g48850 | Solyc06g072510  | BD1G67330 | -          | PIC2                   |
| -         |                 | BD4G32020 | OL12G02770 | Unknown41 (phosphate?) |
| -         |                 | BD5G11740 | OL01G01320 | Unknown42 (phosphate?) |
| At5g26200 |                 | BD1G72940 | OL09G02540 | Unknown43              |
| At1g72820 | Solyc12g096030  | BD1G08301 | OL16G02350 | Unknown44              |
|           | Solyc03g121920  |           |            | Unknown44              |
| At5g15640 | Solyc02g089110  | BD4G31560 | -          | Unknown45              |
| At4g15010 |                 | BD2G12390 | -          | Unknown46              |
| -         |                 | BD3G51060 | -          | Unknown47              |

---
